# Supplementary material for: Defective Sr0.9Mo0.9O3−δ perovskites with exsolved Ni nanoparticles as high-performance composite anodes for solid-oxide fuel cells
Source: Royal Society of Chemistry journal article supplement (doi:10.1039/d1nj02295d), 2021-01-01
Supplement: d1nj02295d1.pdf [file d1nj02295d1.pdf]

## Supplementary information

### Defective $\text{Sr}_{0.9}\text{Mo}_{0.9}\text{O}_{3-\delta}$ perovskites with *exsolved* Ni nanoparticles as high-performance composite anodes for solid-oxide fuel cells

A.L. Larralde<sup>1\*</sup>, L. Troncoso<sup>2</sup>, C. Alvarez-Galvan<sup>3</sup>, V. Cascos<sup>4,5</sup>, M.T. Fernandez-Díaz<sup>6</sup>, J.A. Alonso<sup>4</sup>

<sup>1</sup> Laboratorio de Cristalografía Aplicada. Escuela de Ciencia y Tecnología. Universidad de San Martín. Martín de Irigoyen 3100. Campus Miguelete. San Martín (1650). Buenos Aires, Argentina.

<sup>2</sup> Instituto de Materiales y Procesos Termomecánicos, Universidad Austral de Chile, General Lagos, 2086, 5111187 Valdivia, Chile.

<sup>3</sup> Instituto de Catálisis y Petroleoquímica, C.S.I.C., Cantoblanco, E-28049, Madrid, Spain

<sup>4</sup> Instituto de Ciencia de Materiales de Madrid, C.S.I.C., Cantoblanco, E-28049 Madrid, Spain.

<sup>5</sup> Departamento de Química Inorgánica, Universidad Complutense de Madrid, E-28040, Madrid, Spain

<sup>6</sup> Institut Laue Langevin, BP 156X, F-38042 Grenoble, France.

\* Corresponding author: alarralde@unsam.edu.ar. Tel: +54-11-2033-1400 (int. 6072).

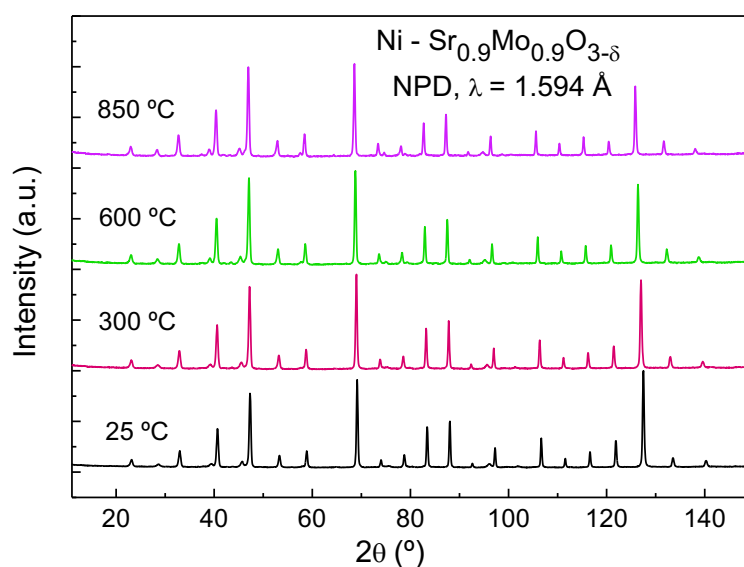

**Fig. S1.** Thermal evolution of the NPD patterns for Ni-Sr<sub>0.90</sub>Mo<sub>0.90</sub>O<sub>3-δ</sub> between 25 and 850 °C. No crystallographic transitions were detected in the entire temperature range.

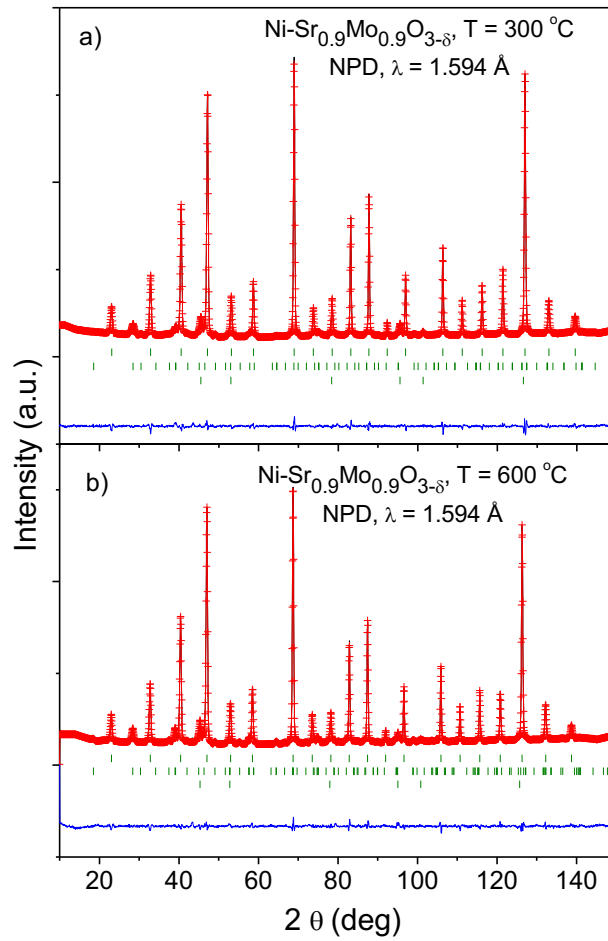

**Fig. S2.** Observed (red crosses), calculated (black full line) and difference (blue line) NPD profiles for the  $\text{Ni-Sr}_{0.9}\text{Mo}_{0.9}\text{O}_{3-\delta}$  composite at a)  $300\text{ }^\circ\text{C}$  and b)  $600\text{ }^\circ\text{C}$ , refined in the  $Pm-3m$  (No. 221) space group. A second and third set of Bragg reflections correspond to minor amounts of oxidized scheelite phase (s.g.  $I4_1/a$ ) and exsolved metallic Ni (s.g.  $Fm-3m$ ) respectively.

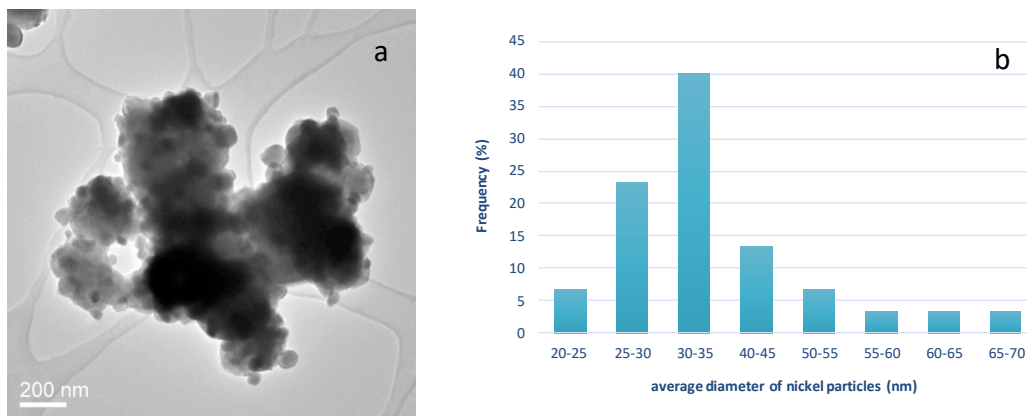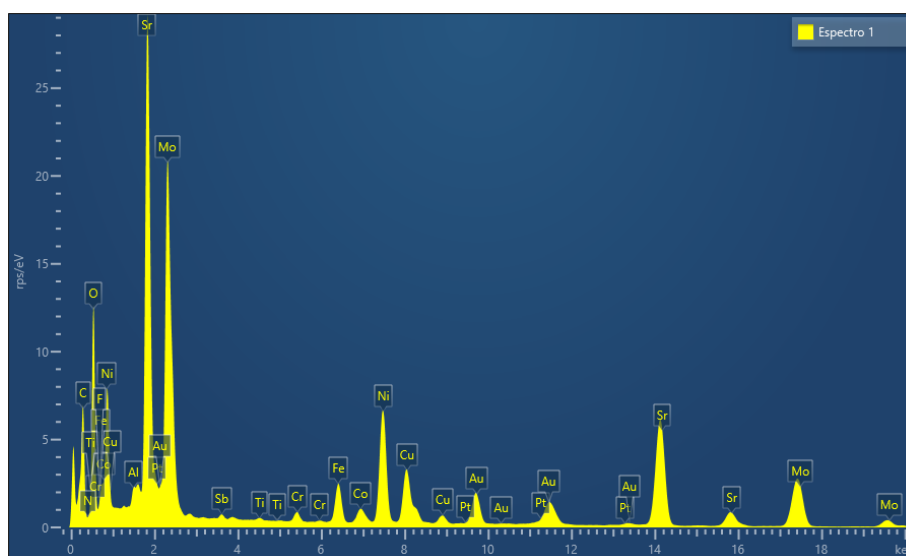

| Element | Obs. (% weight) | Calc.  |
|---------|-----------------|--------|
| O       | 13.94           | 21.90  |
| Ni      | 10.35           | 2.67   |
| Sr      | 31.82           | 36.00  |
| Mo      | 43.89           | 39.41  |
| Total   | 100.00          | 100.00 |

**Fig. S3.** a) Typical particle of  $\text{Sr}_{0.9}\text{MoO}_{3-\delta}$  matrix with exsolved Ni particles adhered at the surface. b) Histogram of the diameter of Ni nanoparticles in correlation with the frequency. The average size is 30-35 nm. c) EDX spectrum showing the major occurrence of Sr, Mo and Ni. The Table below indicates the % weight of Sr, Mo, Ni and O when focusing on a Ni nanoparticle; the rest of the elements are also patent.
